# Supplementary material for: Principal component analysis and the locus of the Fréchet mean in the space of phylogenetic trees
Source: PubMed Central journal article supplement (PMC5793493; doi:10.1093/biomet/asx047), 2017-09-27
Supplement: asx047_supp.pdf [file asx047_supp.pdf]

# Supplementary material for Principal Component Analysis and the Locus of the Fréchet Mean in the Space of Phylogenetic Trees

This supplement gives a proof of the following lemma from the main body of the paper.

**Lemma 2.** *The matrix with elements  $\partial F_j / \partial x_k$  is positive definite for all  $x$  in mutual support region  $S$ .*

*Proof.* Using equation (6) we have

$$\frac{\partial F_j}{\partial x_k} = 2\delta_{jk} + 2 \sum_{i=0}^k p_i Q_{jk}^{(i)}$$

where the matrix  $Q^{(i)}$  has elements

$$Q_{jk}^{(i)} = \frac{\partial}{\partial_k} \left( x_j \frac{\|B_{xv_i}^{(r_{ij})}\|}{\|A_{xv_i}^{(r_{ij})}\|} (1 - C_{ij}) - |e_j|_{v_i} C_{ij} \right).$$

We start by assuming  $C_{ij} = 0$  for all  $i, j$  (so that  $e_i \notin \mathcal{C}(x, v_i)$  for all  $i, j$ ), and drop this assumption later. Then

$$\begin{aligned} Q_{jk}^{(i)} &= \delta_{jk} \frac{\|B_{xv_i}^{(r_{ij})}\|}{\|A_{xv_i}^{(r_{ij})}\|} - x_j \frac{\|B_{xv_i}^{(r_{ij})}\|}{\|A_{xv_i}^{(r_{ij})}\|^2} \frac{\partial}{\partial x_j} \|A_{xv_i}^{(r_{ij})}\| \\ &= \delta_{jk} \frac{\|B_{xv_i}^{(r_{ij})}\|}{\|A_{xv_i}^{(r_{ij})}\|} - x_j x_k I_{jk}^{(i)} \frac{\|B_{xv_i}^{(r_{ij})}\|}{\|A_{xv_i}^{(r_{ij})}\|^3} \end{aligned}$$

where  $I^{(i)}$  is a  $(2N - 2) \times (2N - 2)$  dimensional matrix with  $I_{jk}^{(i)} = 1$  whenever  $e_k$  is contained in  $A_{xv_i}^{(r_{ij})}$  and zero otherwise. Equivalently  $I^{(i)}$  indicates whether splits  $e_j$  and  $e_k$  are simultaneously contracted to zero on  $\Gamma(x, v_i)$ . We will show that the matrices  $Q^{(i)}$  are positive semi-definite. For any vector  $\xi \in \mathbb{R}^{2N-2}$  we have

$$\sum_{j,k} Q_{jk}^{(i)} \xi_j \xi_k = \sum_j \frac{b_j}{a_j} \xi_j^2 - \sum_{j,k} \xi_j \xi_k x_j x_k \frac{b_j}{a_j^3} I_{jk}^{(i)} \quad (\text{S1})$$

where  $a_j = \|A_{xv_i}^{(r_{ij})}\|$  and  $b_j = \|B_{xv_i}^{(r_{ij})}\|$ . Now fix a single set of splits  $A_{xv_i}^{(l)}$  and let  $J_l$  denote the indices of splits in this set. If we restrict the right-hand side

of the last equation to indices  $j \in J_l$  we obtain

$$\sum_{j \in J_l} \frac{b_j}{a_j} \xi_j^2 - \sum_{j,k \in J_l} \xi_j \xi_k x_j x_k \frac{b_j}{a_j}.$$

The terms  $a_j$  adopt the same value for all  $j \in J_l$ , and similarly for  $b_j$ , so they are independent of the summation index in the last expression. Also for  $j \in J_l$

$$a_j^2 = \|A_{xv_i}^{(l)}\|_x = \sum_{m \in J_l} x_m^2.$$

Then

$$\sum_{j,k \in J_l} Q_{j,k}^{(i)} \xi_j \xi_k = \sum_{j \in J_l} \frac{b_j}{a_j} \xi_j^2 - \frac{\sum_{j,k \in J_l} \xi_j \xi_k x_j x_k}{\sum_{m \in J_l} x_m^2} \frac{b_j}{a_j}.$$

The Cauchy-Schwartz inequality shows the right-hand side is  $\geq 0$  since  $a_j, b_j$  are constant over this range of  $j$ . It follows that the right-hand side of equation (S1) is  $\geq 0$ , so each matrix  $Q^{(i)}$  is positive semi-definite. If we drop the assumption that  $C_{ij} = 0$  for all  $i, j$ , this introduces rows and columns of zeros into each matrix  $Q^{(i)}$ . However, the matrices  $Q^{(i)}$  must therefore remain positive semi-definite, and this establishes the claim in the statement of the proof.  $\square$

It is relatively straightforward to prove the weaker result that the matrices with elements  $\partial F_j / \partial x_k$  are positive semi-definite. The functions  $f_i : \mathcal{T}_N \rightarrow \mathcal{R}$  defined by  $f_i(x) = d(x, v_i)$  are convex (Bridson & Haefliger, 2011, Proposition 2.2). It follows that the objective function  $\Omega$  is convex, since it is a convex combination of convex functions. Then, within the interior of any orthant, the matrix of second derivatives of  $\Omega$  with respect to the edge lengths must be positive semi-definite. However, invertibility of the matrices is required in order to establish Theorem 1 in the paper, and this requires the stronger result stated in Lemma 2.

## References

BRIDSON, M. R. & HAEFLIGER, A. (2011). *Metric Spaces of Non-Positive Curvature*. Springer, Berlin.
